# Supplementary material
Source: publisher site journal article supplement (https://www.dovepress.com/article/223694)

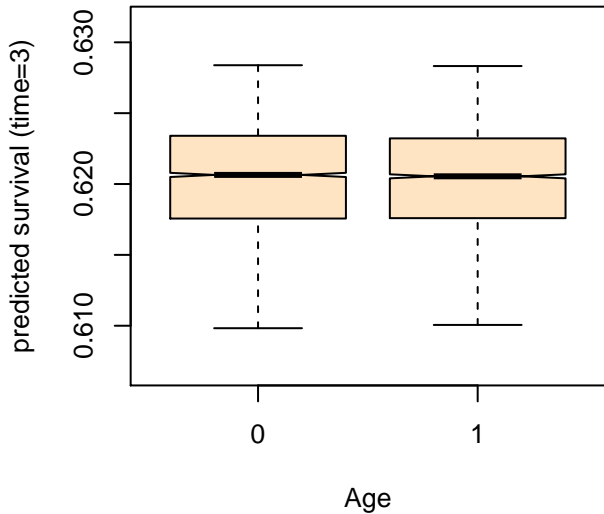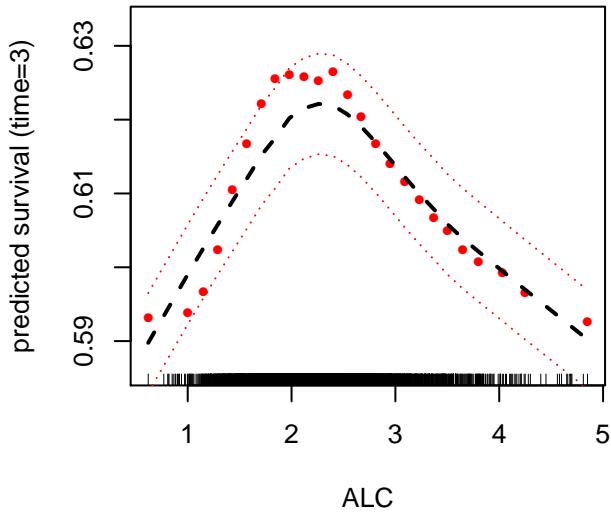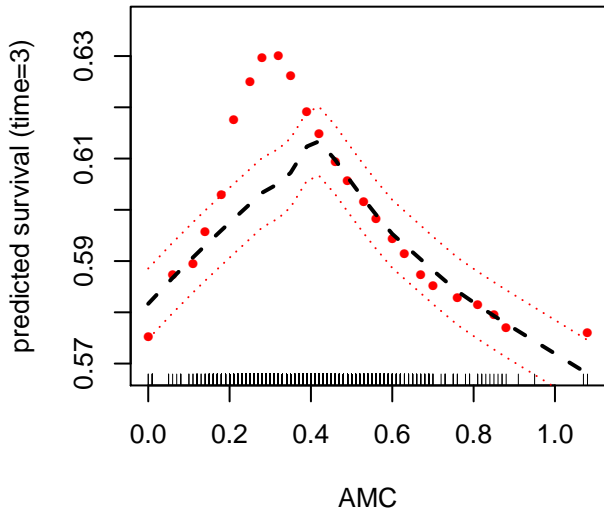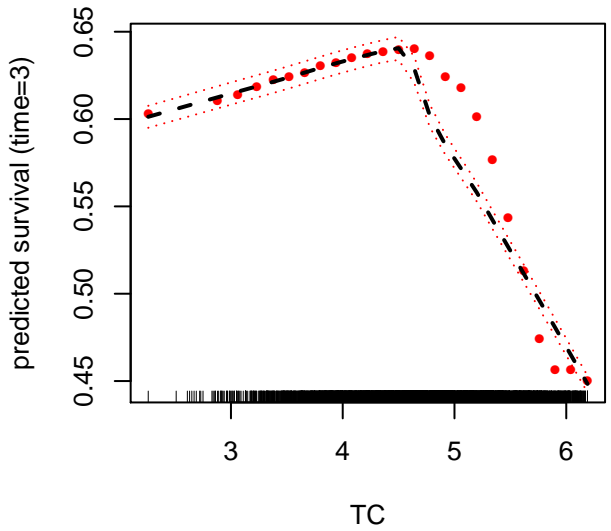

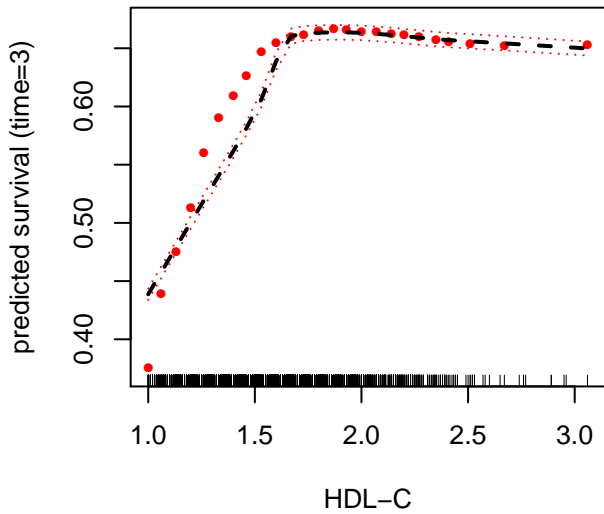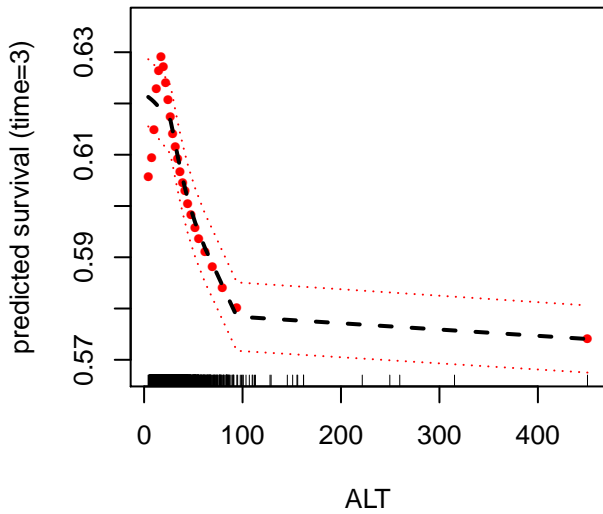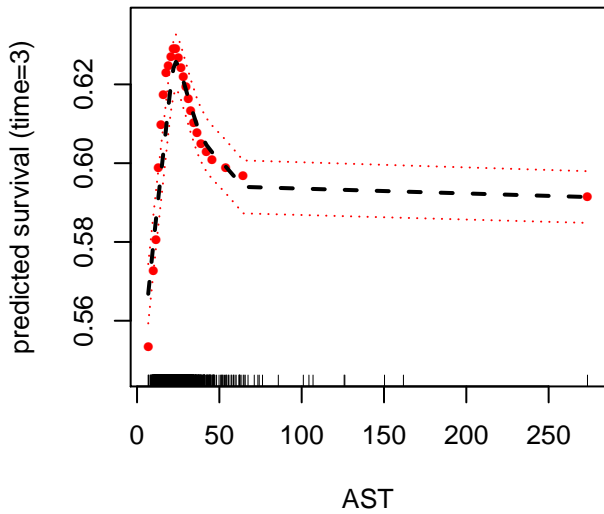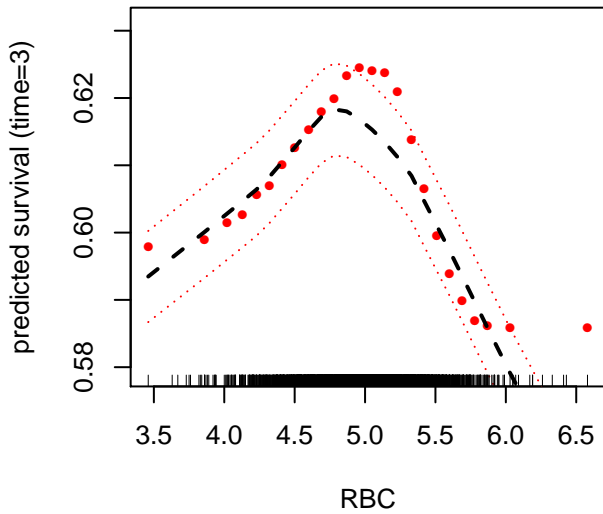

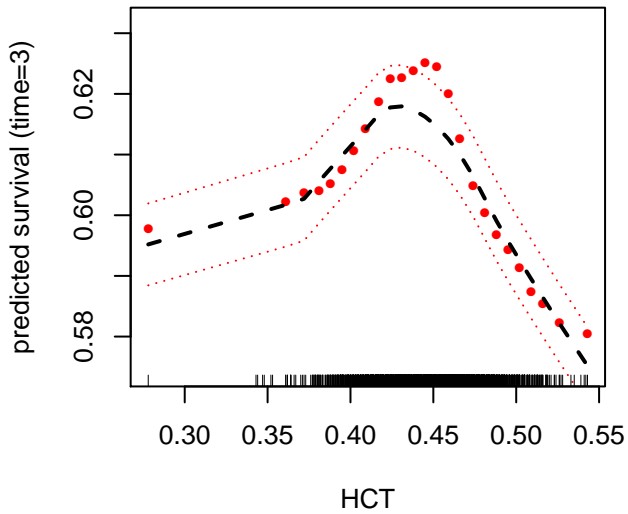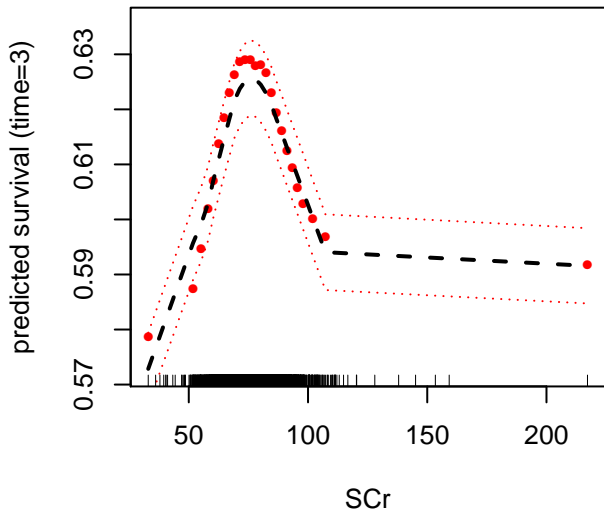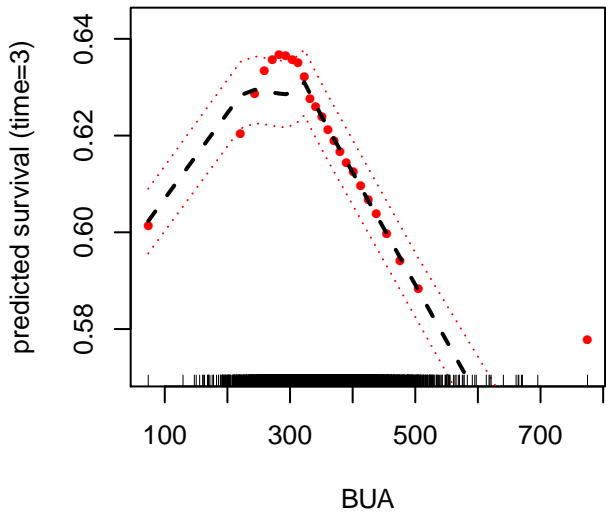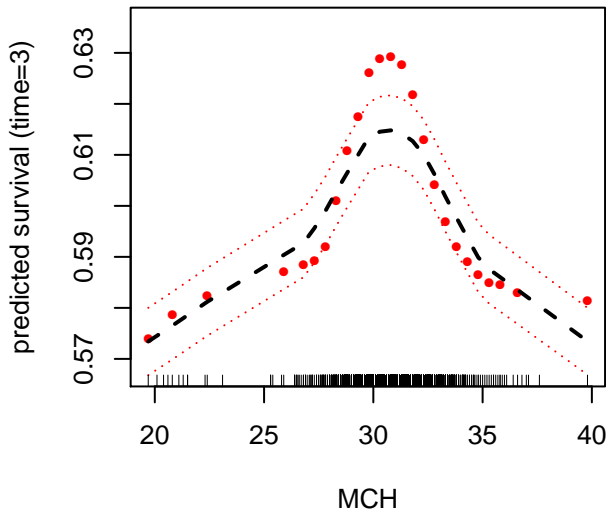

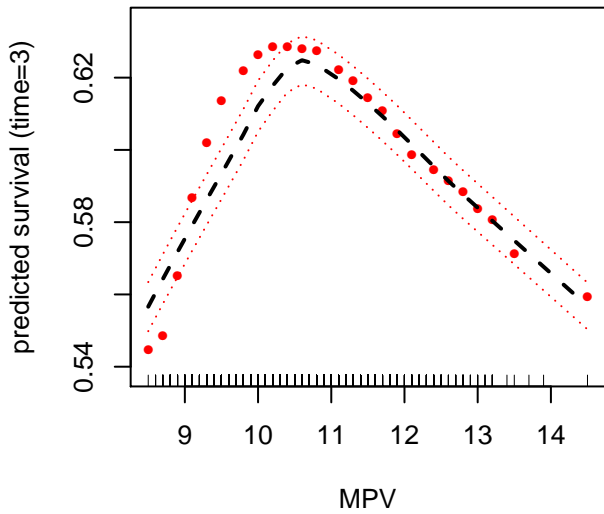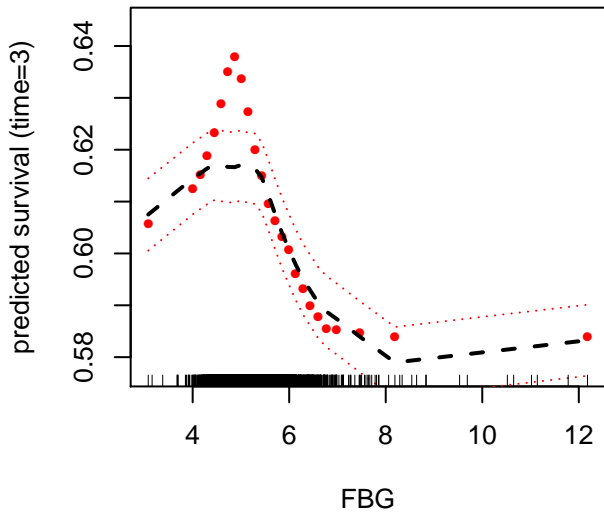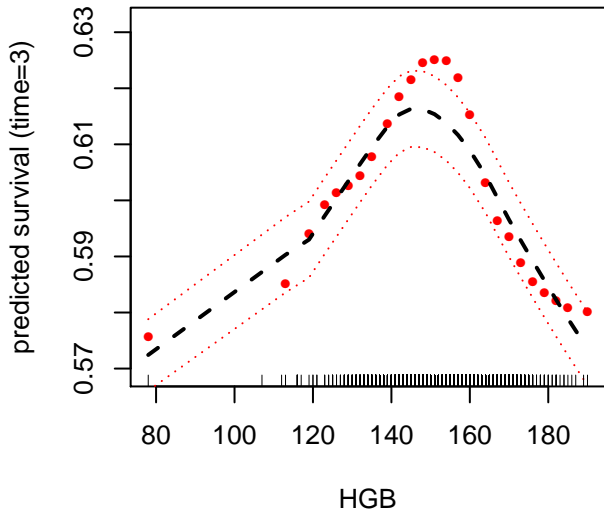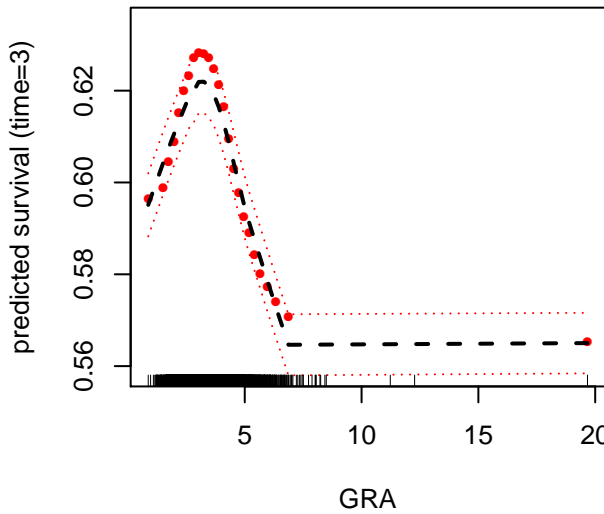

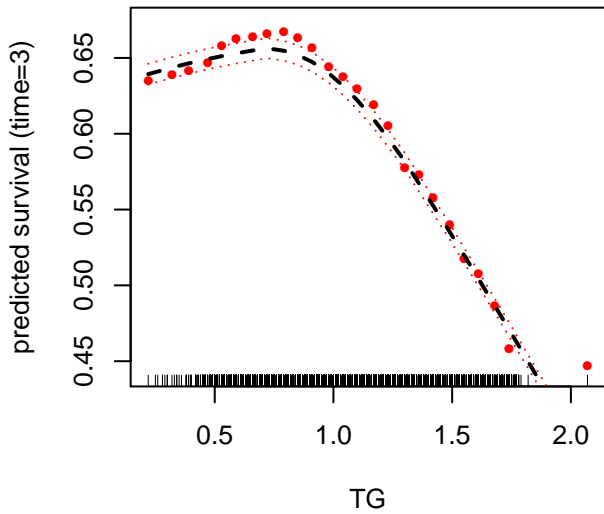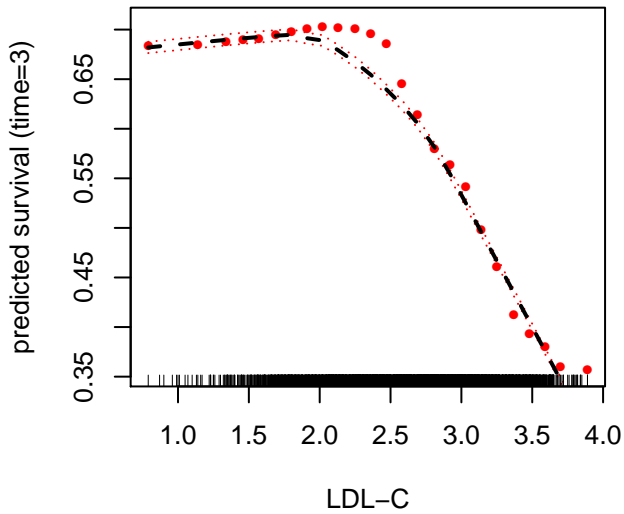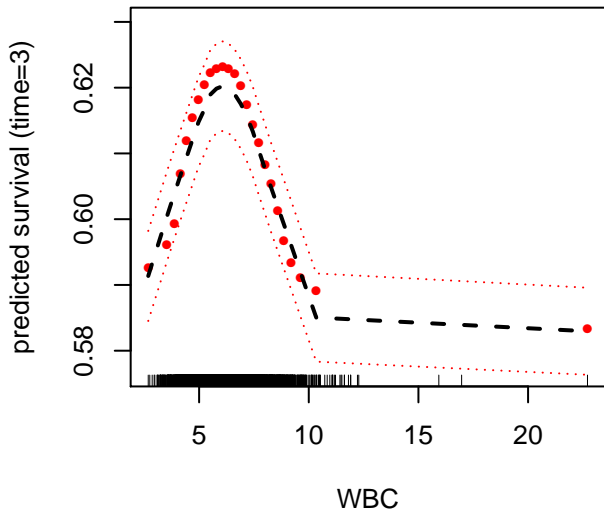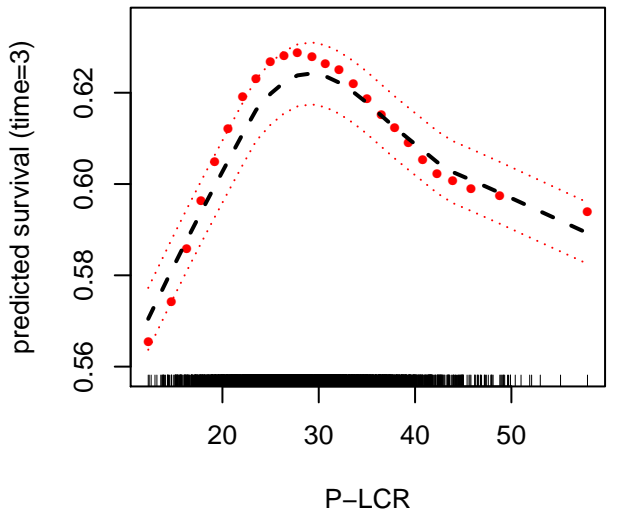

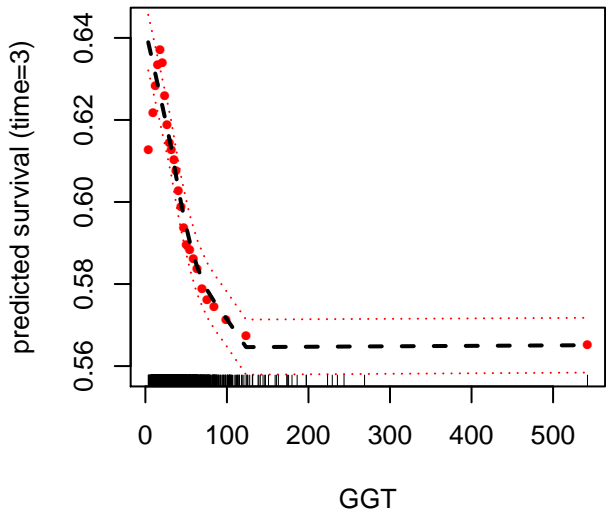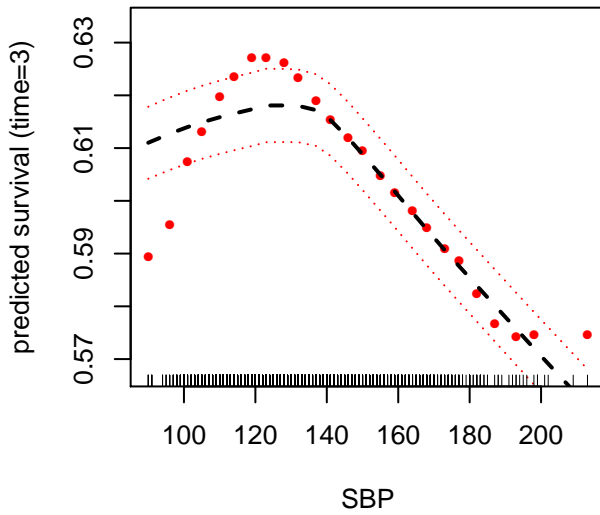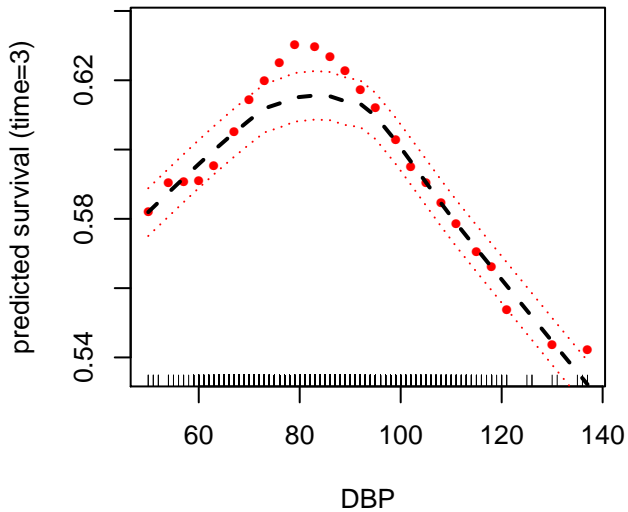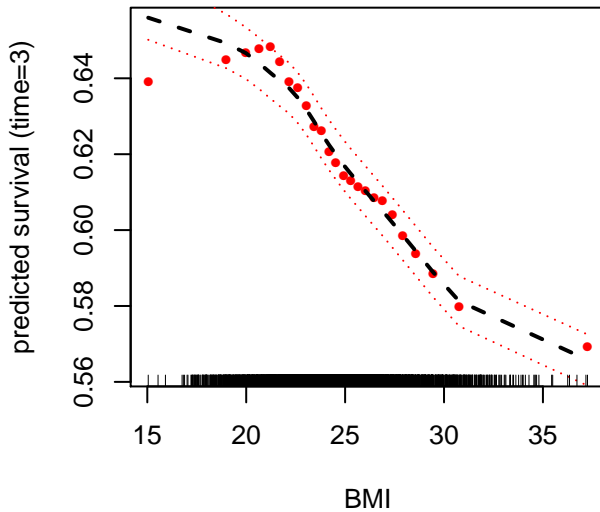

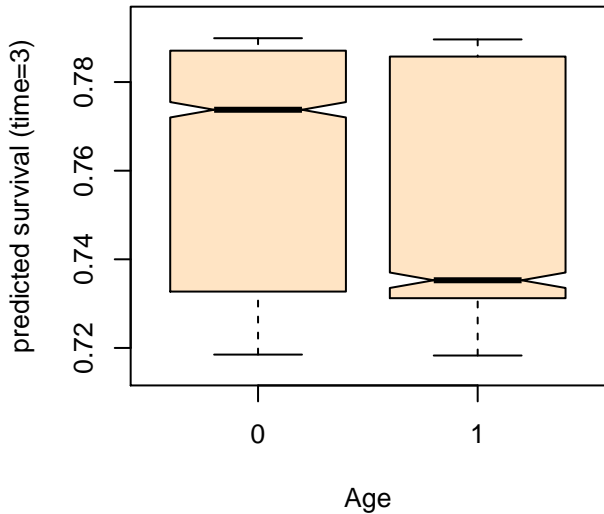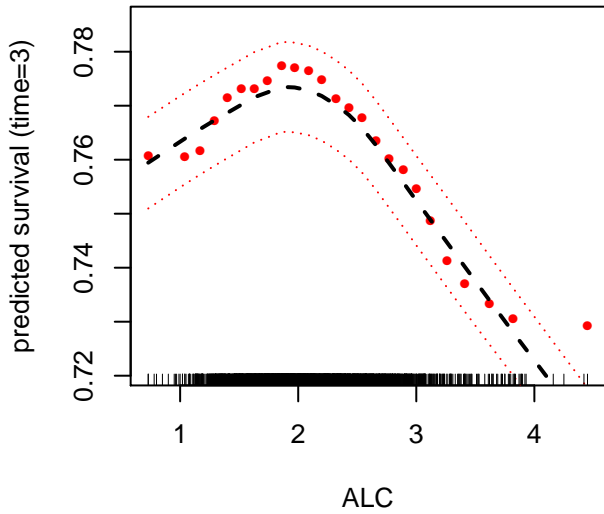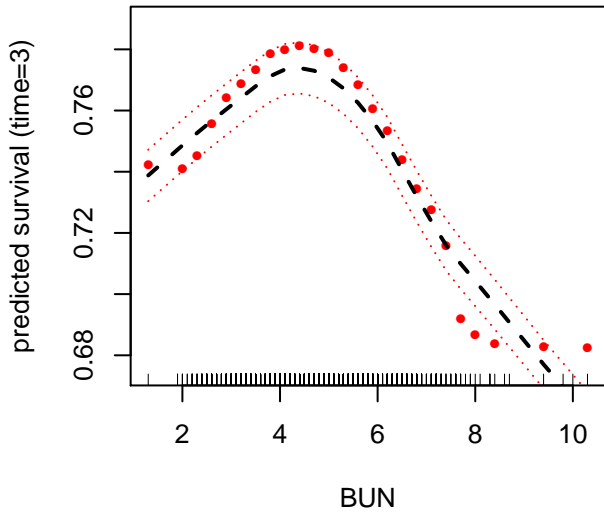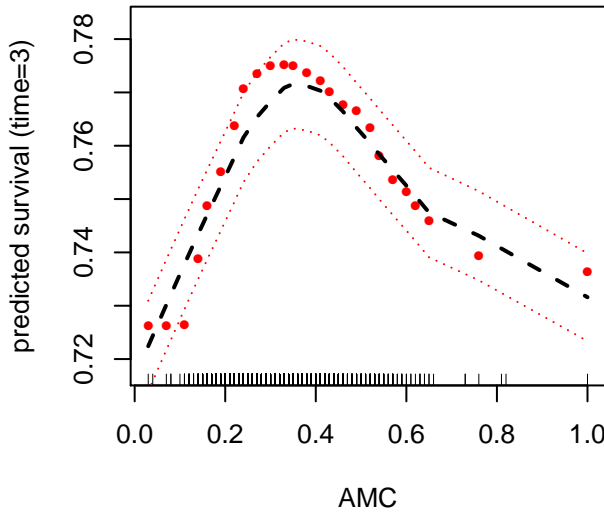

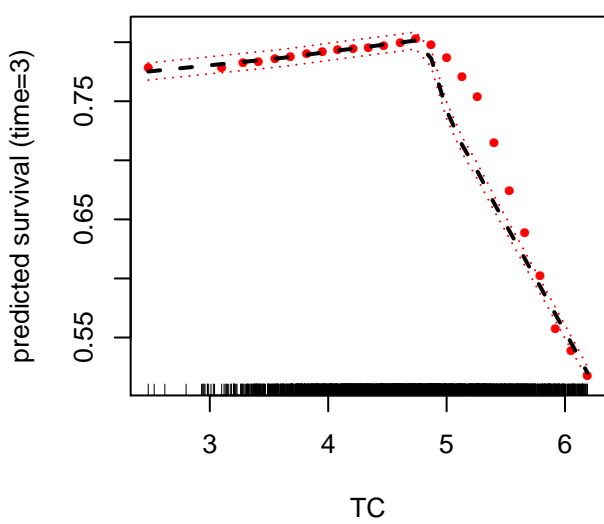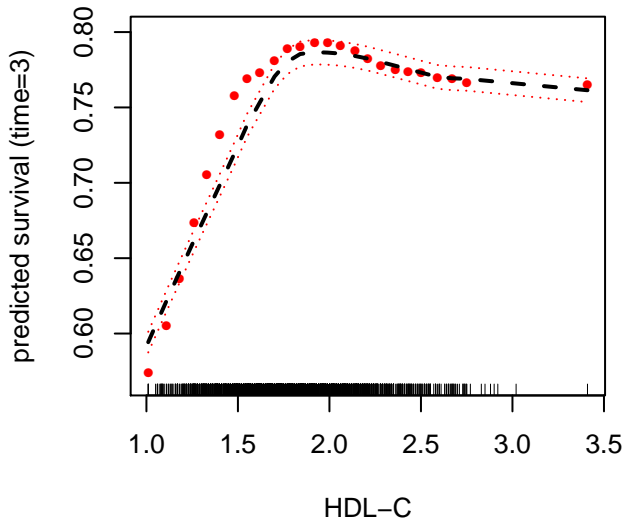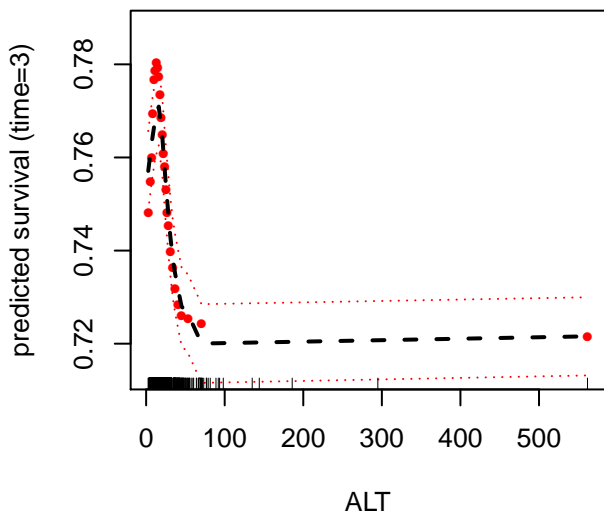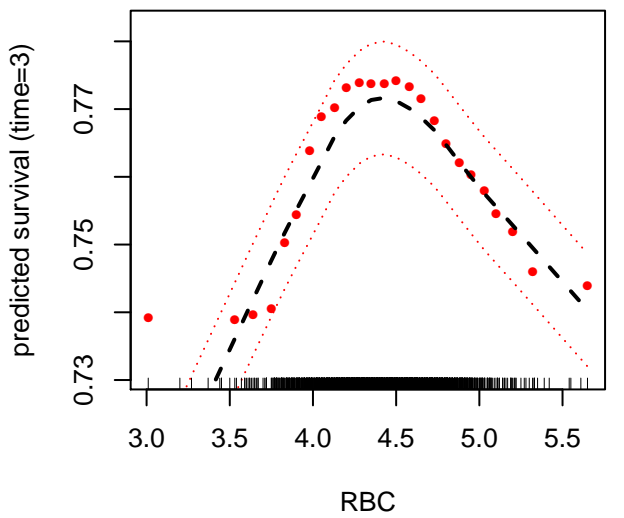



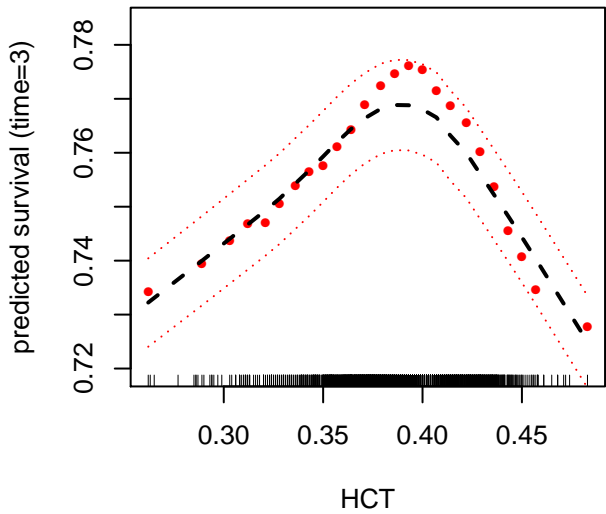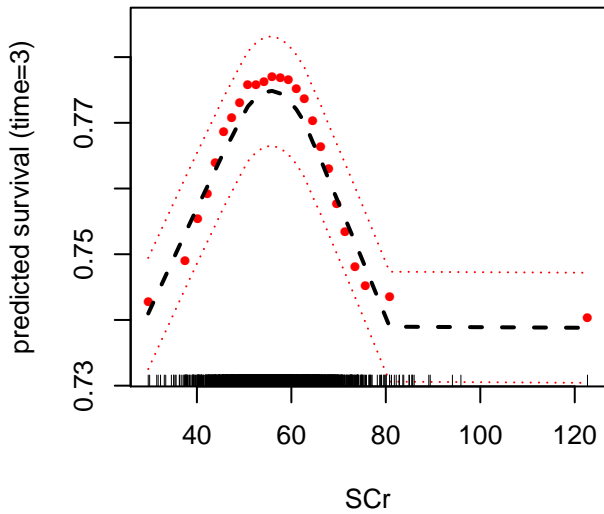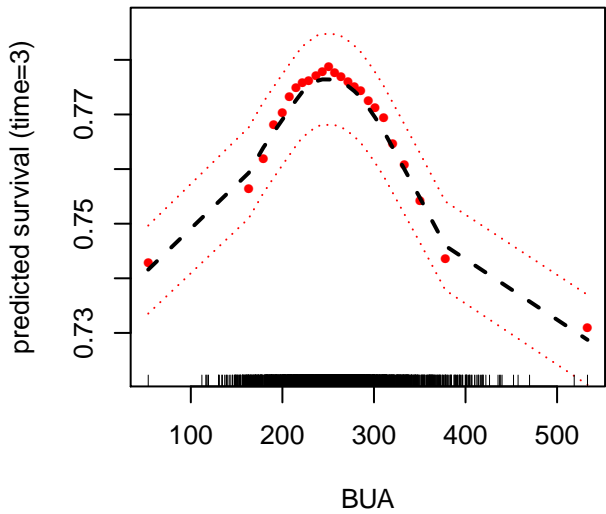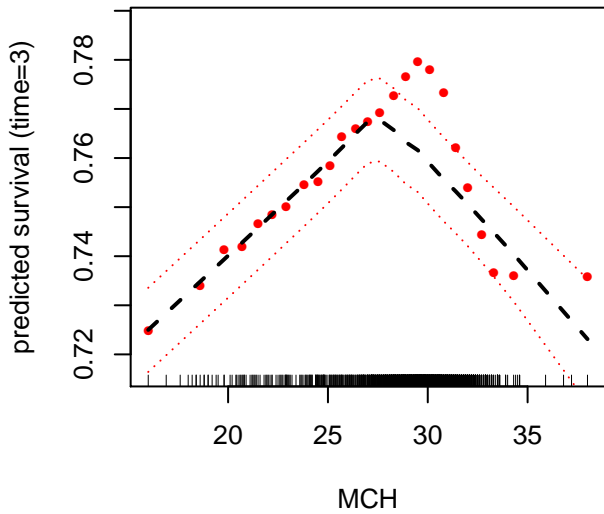

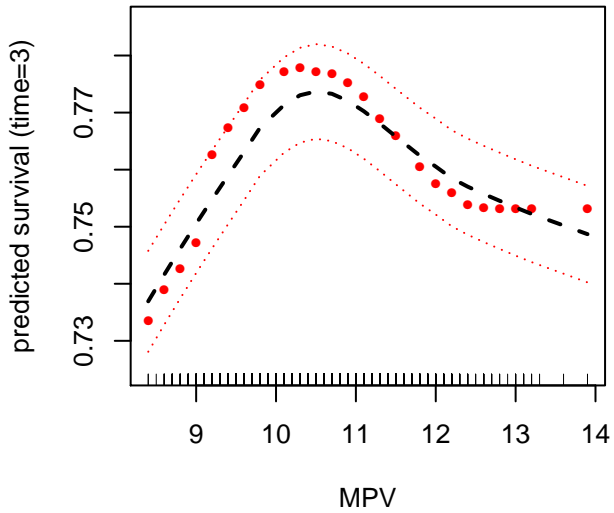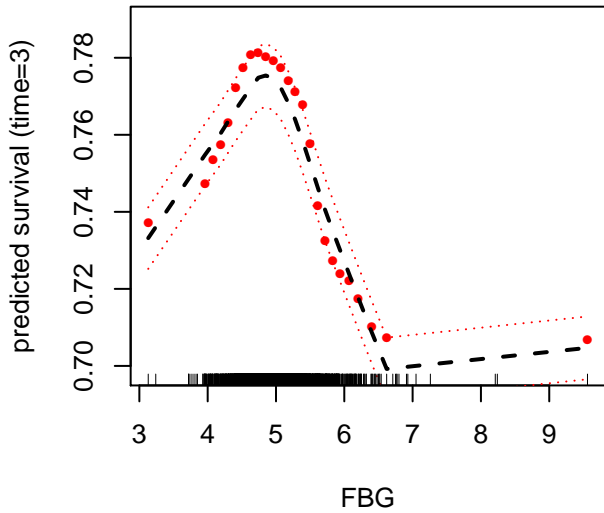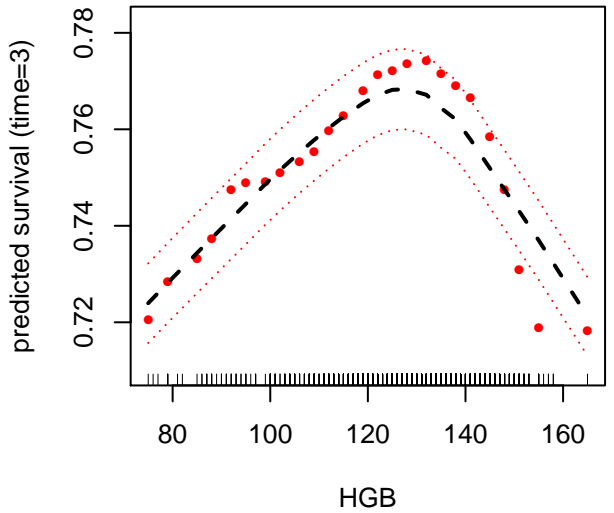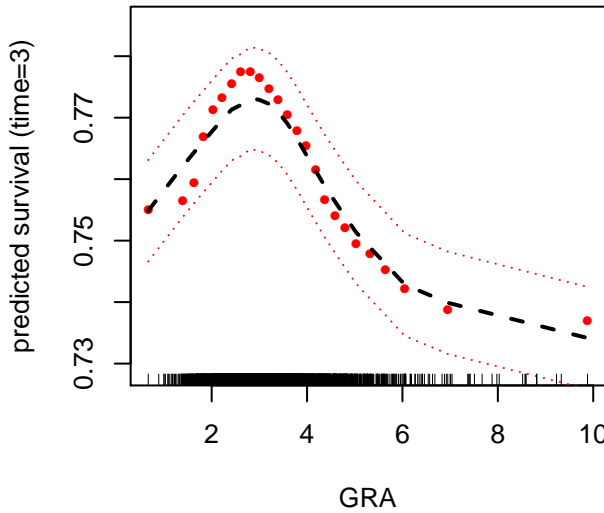

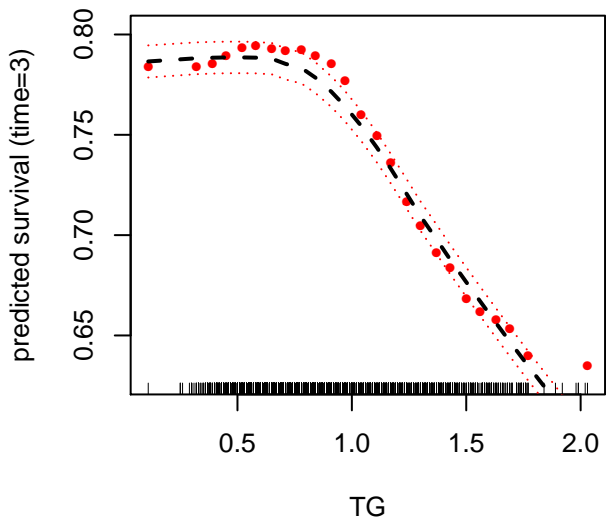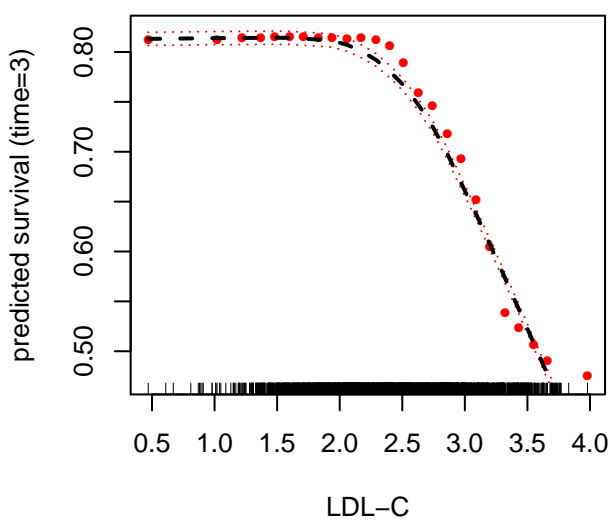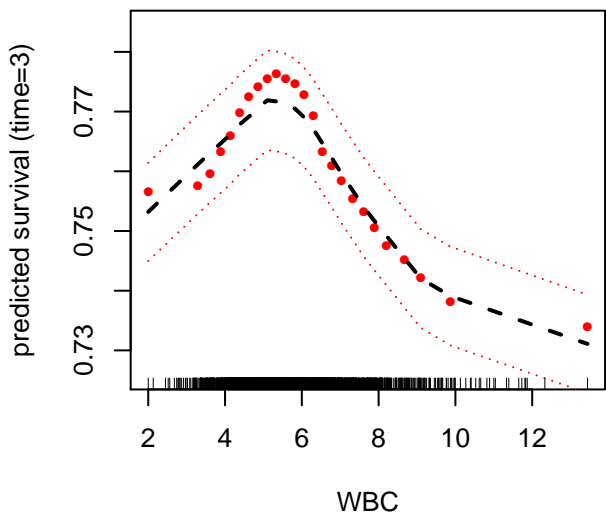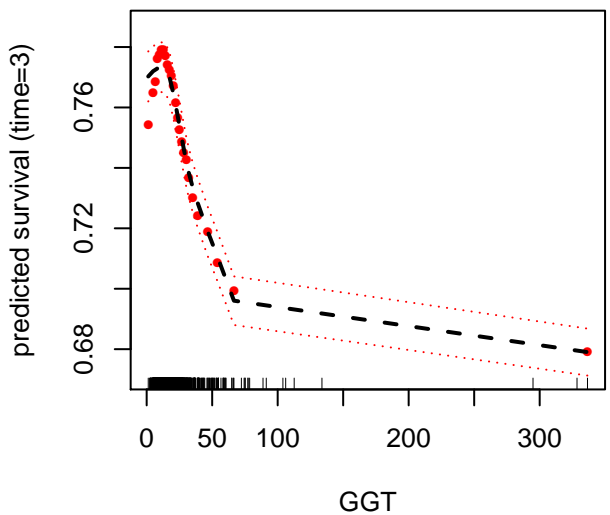

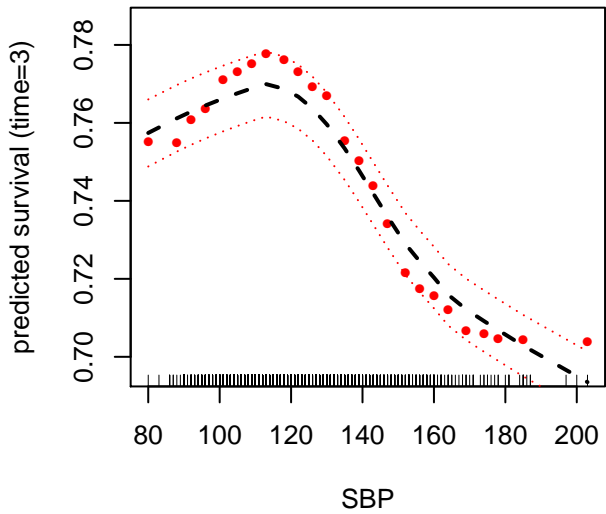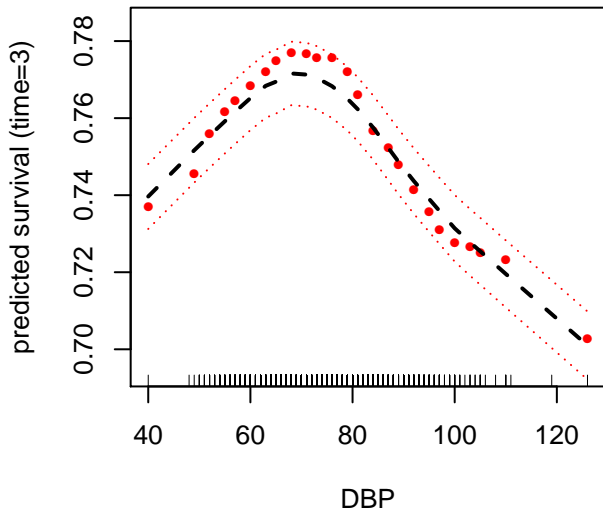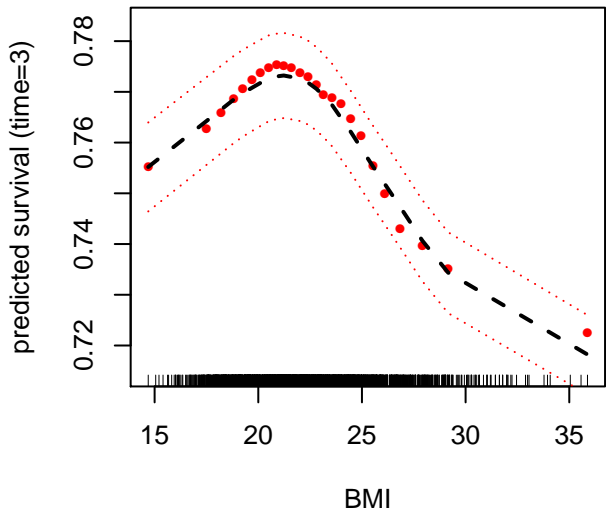

Supplement: Supplementary file 1 [file get_supplementary_file.php]
